# Supplementary material for: Towards Sustainable Material: Optimizing Geopolymer Mortar Formulations for 3D Printing: A Life Cycle Assessment Approach
Source: MDPI journal article supplement (doi:10.3390/su16083328), 2024-04-16

# Environmental model and optimisation pathway for Potassium Silicate and Metakaolin based geopolymer with earth additions for 3D printing

Corentin Le Gall [1], Charlotte Roux [1], Julien Archez [1], [Adélaïde Fresnet-Férraille \[1\]](#), Jean-François Caron [1]

[1] Navier Laboratory, Gustave Eiffel University, Ecole des Ponts ParisTech, CNRS, Champ sur Marne, France

## Supporting information

### S1 PROCESS DETAILED MODELISATION

#### Parameters used in formula description

| Notation         | Comments                                                      |
|------------------|---------------------------------------------------------------|
| <b>Q_MK</b>      | Metakaolin massic share in matrix (default = 0.5)             |
| <b>Q_LKMK</b>    | Low-kaolinite Metakaolin massic share in matrix (default = 0) |
| <b>Q_GeoS</b>    | Geosil massic share in matrix (default =0.5)                  |
| <b>D_MK</b>      | Transport distance for metakaolin                             |
| <b>D_PSS</b>     | Transport distance for Geosil (potassium silicate)            |
| <b>S0/S1..Sn</b> | UpScale scenario                                              |

#### Geopolymer GP-SE (m3)

| Amount       | Unit | Product       | Activity        | Location | Database    | Formula |
|--------------|------|---------------|-----------------|----------|-------------|---------|
| <b>751.8</b> | kg   | GP matrix     | GP matrix       | FR       | geopolymers | 375.9*2 |
| <b>496.2</b> | kg   | Steamed earth | Steamed earth   | GLO      | geopolymers |         |
| <b>255.6</b> | kg   | sand          | market for sand | CH       | cutoff371   |         |

#### GP matrix (1 kg)

| Amount          | Unit | Product                                             | Activity                                                   | Location | Database    | Formula                      |
|-----------------|------|-----------------------------------------------------|------------------------------------------------------------|----------|-------------|------------------------------|
| <b>0.5</b>      | kg   | Geosil 14515                                        | Geosil 14515                                               | FR       | geopolymers | Q_GeoS                       |
| <b>0.0</b>      | kg   | LK Metakaolin                                       | LK Metakaolin                                              | FR       | geopolymers | Q_MK*(S4 + S5)               |
| <b>0.5</b>      | kg   | Metakaolin                                          | Metakaolin                                                 | FR       | geopolymers | Q_MK*(S0+S1+S2+S3)           |
| <b>0.006993</b> | kWh  | electricity, low voltage                            | market electricity, low voltage                            | FR       | cutoff371   | 0.006993*(S0+S1+S2+S3+S4)    |
| <b>0.2675</b>   | t.km | transport, freight, lorry 3.5-7.5 metric ton, EURO4 | market transport, freight, lorry 3.5-7.5 metric ton, EURO4 | RER      | cutoff371   | D_MK*(Q_MK+Q_LKMK)/1000 * S0 |
| <b>0.252</b>    | t.km | transport, freight, lorry 3.5-7.5 metric ton, EURO4 | market transport, freight, lorry 3.5-7.5 metric ton, EURO4 | RER      | cutoff371   | D_PSS*Q_GeoS /1000 * S0      |

|     |      |                                           |                                                                                                          |     |           |                                                          |
|-----|------|-------------------------------------------|----------------------------------------------------------------------------------------------------------|-----|-----------|----------------------------------------------------------|
| 0.0 | t.km | transport, freight, lorry, unspecified    | market for transport, freight, lorry, unspecified                                                        | RER | cutoff371 | $D\_MK * (Q\_MK + Q\_LKMK) / 1000 * (S1)$                |
| 0.0 | t.km | transport, freight, lorry, unspecified    | market for transport, freight, lorry, unspecified                                                        | RER | cutoff371 | $D\_PSS * Q\_GeoS / 1000 * (S1)$                         |
| 0.0 | t.km | transport, freight, lorry, unspecified    | transport, freight, lorry, all sizes, EURO6 to generic market for transport, freight, lorry, unspecified | RER | cutoff371 | $D\_MK * (Q\_MK + Q\_LKMK) / 1000 * (S2 + S3 + S4 + S5)$ |
| 0.0 | t.km | transport, freight, lorry, unspecified    | transport, freight, lorry, all sizes, EURO6 to generic market for transport, freight, lorry, unspecified | RER | cutoff371 | $D\_PSS * Q\_GeoS / 1000 * (S2 + S3 + S4 + S5)$          |
| 0.0 | kWh  | electricity, low voltage, label-certified | market for electricity, low voltage, label-certified                                                     | CH  | cutoff371 | $0.006993 * (S5)$                                        |

### Steamed earth (kg)

| Amount | Unit          | Product                  | Activity                            | Location | Database    | Formula |
|--------|---------------|--------------------------|-------------------------------------|----------|-------------|---------|
| 1.3    | kg            | Raw earth                | Raw earth                           | GLO      | geopolymers |         |
| 0.1    | kilowatt hour | electricity, low voltage | market for electricity, low voltage | FR       | cutoff371   |         |

### Raw earth (kg)

| Amount | Unit     | Product | Activity           | Location | Database  | Formula |
|--------|----------|---------|--------------------|----------|-----------|---------|
| 1.0    | kilogram | clay    | clay pit operation | CH       | cutoff371 |         |

### Geosil 14515 (kg)

| Amount | Unit     | Product                                         | Activity                                        | Location                   | Database    | Formula |
|--------|----------|-------------------------------------------------|-------------------------------------------------|----------------------------|-------------|---------|
| 0.45   | kg       | Potassium silicate, WITHOUT WATER, 48% solution | Potassium silicate, WITHOUT WATER, 48% solution | FR                         | geopolymers |         |
| 0.55   | kilogram | tap water                                       | market for tap water                            | Europe without Switzerland | cutoff371   |         |

Potassium silicate based on ecoinvent activity Sodium Silicate. Molar equivalent for the quantity of potassium hydroxide. Contextualization: in activity "Potassium silicate, WITHOUT WATER, 48% solution" from the ecoinvent database, changing market for potassium hydroxide, GLO by RER market, removing container ship freight and production from RoW.

### Raw earth (kg)

| Amount | Unit | Product | Activity | Location | Database | Formula |
|--------|------|---------|----------|----------|----------|---------|
|--------|------|---------|----------|----------|----------|---------|

|      |          |                                                 |                                                 |                    |         |             |
|------|----------|-------------------------------------------------|-------------------------------------------------|--------------------|---------|-------------|
| 0.45 | kg       | Potassium silicate, WITHOUT WATER, 48% solution | Potassium silicate, WITHOUT WATER, 48% solution | FR                 |         | geopolymers |
| 0.55 | kilogram | tap water                                       | market for tap water                            | Europe Switzerland | without | cutoff371   |

## Metakaolin (kg)

| Amount | Unit | Product                                              | Activity                                                                              | Location | Database    | Formula          |
|--------|------|------------------------------------------------------|---------------------------------------------------------------------------------------|----------|-------------|------------------|
| 2.5    | MJ   | heat, district or industrial, natural gas            | heat and power co-generation, natural gas, conventional power plant, 100MW electrical | FR       | cutoff371   | $2.5*(S0+S1+S2)$ |
| 1.16   | kg   | kaolin                                               | kaolin production                                                                     | FR       | geopolymers |                  |
| 1.0    | MJ   | heat, central or small-scale, other than natural gas | heat and power co-generation, biogas, gas engine                                      | FR       | cutoff371   | $2.5*(S3+S4)$    |
| 1e-10  | unit | ceramic factory                                      | ceramic factory construction                                                          | CH       | cutoff371   |                  |

Kaolin production has been derived from the ecoinvent process RER contextualized to French conditions, changing the electricity mix

## Low kaolinite metakaolin (kg)

| Amount | Unit | Product                                              | Activity                                                                              | Location | Database  | Formula                |
|--------|------|------------------------------------------------------|---------------------------------------------------------------------------------------|----------|-----------|------------------------|
| 1e-10  | unit | ceramic factory                                      | ceramic factory construction                                                          | CH       | cutoff371 |                        |
| 1.16   | kg   | clay                                                 | clay pit operation                                                                    | CH       | cutoff371 |                        |
| 2.5    | MJ   | heat, district or industrial, natural gas            | heat and power co-generation, natural gas, conventional power plant, 100MW electrical | FR       | cutoff371 | $2.5*(S0+S1+S2+S3+S4)$ |
| 1.0    | kg   | packing, clay product                                | packing, clay product                                                                 | CH       | cutoff371 |                        |
| 0.0    | MJ   | heat, central or small-scale, other than natural gas | heat and power co-generation, biogas, gas engine                                      | FR       | cutoff371 | $2.5*S5$               |

## GP-GfW (kg)

| Amount   | Unit | Product                                             | Activity                                                       | Location | Database    | Formula |
|----------|------|-----------------------------------------------------|----------------------------------------------------------------|----------|-------------|---------|
| 0.45     | kg   | Geosil 14515                                        | Geosil 14515                                                   | FR       | geopolymers |         |
| 0.55     | kg   | Metakaolin                                          | Metakaolin                                                     | FR       | geopolymers |         |
| 0.006993 | kWh  | electricity, low voltage                            | market for electricity, low voltage                            | FR       | cutoff371   |         |
| 0.296    | t.km | transport, freight, lorry 3.5-7.5 metric ton, EURO4 | market for transport, freight, lorry 3.5-7.5 metric ton, EURO4 | RER      | cutoff371   |         |

## Market for wollastonite (kg)

From market for asbestos, chrysotile type in ecoinvent database. Transport distance modified: <https://www.searates.com/services/distances-time/>

Wollastonite from Mexico : 315 km by lorry to coast, 12871.5 container ship, 33.5 km lorry

Wollastonite production : Proxy based on asbestos production in ecoinvent v3.7.1, asbestos production, chrysotile type. Changes made: removing biosphere flow: Chrysotile, in ground 1.11, adding -> wollastonite, in ground not possible. Only in ReCiPe2016. adding, "clay, unspecified" 1.11

| Amount | Unit     | Product                                         | Activity                                        | Location           | Database          | Formula |
|--------|----------|-------------------------------------------------|-------------------------------------------------|--------------------|-------------------|---------|
| 0.45   | kg       | Potassium silicate, WITHOUT WATER, 48% solution | Potassium silicate, WITHOUT WATER, 48% solution | FR                 | geopolymers       |         |
| 0.55   | kilogram | tap water                                       | market for tap water                            | Europe Switzerland | without cutoff371 |         |

## Market for glass fibre (kg)

Market for glass fibre, adapted from market for fibre, GLO to account for French providers. Production site : LAUDUN L'ARDOISE 30290 -> 700 km

Glass fibre production: from glass fibre production, RER, contextualized with a French electricity mix (medium voltage)

| Amount | Unit | Product                                | Activity                                                | Location | Database    | Formula |
|--------|------|----------------------------------------|---------------------------------------------------------|----------|-------------|---------|
| 0.7    | t.km | transport, freight, lorry, unspecified | market group for transport, freight, lorry, unspecified | GLO      | cutoff371   |         |
| 1.0    | kg   | glass fibre                            | glass fibre production                                  | FR       | geopolymers |         |

## S2 IMPACT CATEGORIES

### ILCD indicators and used abbreviations

| Impact Category                          | Abreviation | unit       |
|------------------------------------------|-------------|------------|
| climate change total                     | CC          | kg CO2-Eq  |
| freshwater and terrestrial acidification | FTA         | mol H+-Eq  |
| freshwater ecotoxicity                   | FEx         | CTU        |
| freshwater eutrophication                | FEu         | kg P-Eq    |
| marine eutrophication                    | MEu         | kg N-Eq    |
| terrestrial eutrophication               | TEu         | mol N-Eq   |
| carcinogenic effects                     | CE          | CTUh       |
| ionising radiation                       | IR          | kg U235-Eq |
| non-carcinogenic effects                 | nCE         | CTUh       |
| ozone layer depletion                    | OD          | kg CFC-11. |
| photochemical ozone creation             | POCP        | kg NMVOC-. |
| respiratory effects, inorganics          | RE          | disease i. |
| resources, dissipated water              | DW          | m3 water-. |
| resources, fossils                       | RF          | megajoule  |
| resources, land use                      | RLU         | points     |
| resources, minerals and metals           | RMM         | kg Sb-Eq   |

| cumulative Energy Demand | CED | MJ-Eq |
|--------------------------|-----|-------|
|--------------------------|-----|-------|

## Exhaustive results for unit element

|                                                                      |      | CC        | FTA       | FEx      | FEu      | MEu      | TEu      | CE       | IR         | nCE      |
|----------------------------------------------------------------------|------|-----------|-----------|----------|----------|----------|----------|----------|------------|----------|
| process                                                              | unit | kg CO2-Eq | mol H+-Eq | CTU      | kg P-Eq  | kg N-Eq  | mol N-Eq | CTUh     | kg U235-Eq | CTUh     |
| cement, Portland                                                     | kg   | 8.57E-01  | 1.95E-03  | 8.98E-02 | 8.67E-05 | 5.33E-04 | 6.04E-03 | 4.18E-09 | 3.34E-02   | 3.82E-08 |
| tap water                                                            | kg   | 3.44E-04  | 1.87E-06  | 1.04E-03 | 2.48E-07 | 3.70E-07 | 3.47E-06 | 9.05E-11 | 1.19E-04   | 1.51E-10 |
| sand                                                                 | kg   | 4.92E-03  | 3.47E-05  | 1.16E-02 | 7.25E-07 | 1.29E-05 | 1.44E-04 | 3.56E-10 | 9.90E-04   | 6.80E-10 |
| electricity, low voltage                                             | kWh  | 1.16E-01  | 5.54E-04  | 1.12E-01 | 3.72E-05 | 1.38E-04 | 1.12E-03 | 5.32E-09 | 5.43E-01   | 1.79E-08 |
| Metakaolin                                                           | kg   | 2.74E-01  | 1.12E-03  | 7.73E-02 | 1.04E-04 | 1.77E-04 | 1.73E-03 | 2.62E-09 | 5.20E-02   | 2.21E-08 |
| Potassium silicate solution (Geosil 14515)                           | kg   | 6.18E-01  | 3.19E-03  | 6.33E-01 | 3.16E-04 | 6.68E-04 | 7.01E-03 | 2.40E-08 | 1.36E-01   | 8.57E-08 |
| transport, freight, lorry 3.5-7.5 metric ton, EURO4                  | t.km | 5.08E-01  | 2.38E-03  | 9.72E-01 | 4.94E-05 | 7.81E-04 | 8.50E-03 | 1.50E-08 | 4.31E-02   | 6.29E-08 |
| glass fibre                                                          | kg   | 1.74E+00  | 1.38E-02  | 4.49E+00 | 1.98E-04 | 3.14E-03 | 3.29E-02 | 5.60E-08 | 8.87E-01   | 9.02E-07 |
| wollastonite                                                         | kg   | 2.62E-01  | 4.76E-03  | 2.46E-01 | 3.19E-05 | 1.21E-03 | 1.35E-02 | 8.05E-09 | 1.87E-02   | 1.85E-08 |
| Steamed earth                                                        | kg   | 2.07E-02  | 1.35E-04  | 5.15E-02 | 7.28E-06 | 3.87E-05 | 4.25E-04 | 3.91E-09 | 5.49E-02   | 4.18E-09 |
| Raw earth                                                            | kg   | 7.03E-03  | 6.15E-05  | 3.10E-02 | 2.74E-06 | 1.92E-05 | 2.41E-04 | 2.60E-09 | 4.67E-04   | 1.84E-09 |
| silica fume, densified                                               | kg   | 3.15E-03  | 2.02E-05  | 8.04E-03 | 3.30E-07 | 7.40E-06 | 8.07E-05 | 1.00E-10 | 2.31E-04   | 4.44E-10 |
| calcium nitrate                                                      | kg   | 1.62E+00  | 9.68E-03  | 1.29E+00 | 3.16E-04 | 1.17E-03 | 3.43E-02 | 6.38E-08 | 6.96E-02   | 1.76E-07 |
| plasticiser, for concrete, based on sulfonated melamine formaldehyde | kg   | 1.38E+00  | 8.98E-03  | 1.18E+00 | 4.41E-04 | 1.38E-03 | 1.44E-02 | 2.96E-08 | 9.71E-02   | 2.08E-07 |
| transport, concrete 50MPa, m3                                        | m3   | 2.63E+01  | 1.46E-01  | 5.95E+01 | 2.74E-03 | 5.21E-02 | 5.69E-01 | 7.88E-07 | 2.34E+00   | 3.52E-06 |

|                                                     |      | OD         | POCP      | RE         | DW        | RF       | RLU      | RMM      | CED   |
|-----------------------------------------------------|------|------------|-----------|------------|-----------|----------|----------|----------|-------|
| process                                             | unit | kg CFC-11. | kg NMVOC. | disease i. | m3 water. | MJ       | points   | kg Sb-Eq | MJ-Eq |
| cement, Portland                                    | kg   | 2.58E-08   | 1.52E-03  | 9.20E-09   | 7.33E-02  | 3.77E+00 | 1.14E+00 | 1.27E-06 | 3.7   |
| tap water                                           | kg   | 2.29E-11   | 1.12E-06  | 1.61E-11   | 2.51E-04  | 6.72E-03 | 2.38E-03 | 1.55E-09 | 0.0   |
| sand                                                | kg   | 9.81E-10   | 3.94E-05  | 6.99E-10   | 1.72E-03  | 8.11E-02 | 1.75E-01 | 4.13E-08 | 0.1   |
| electricity, low voltage                            | kWh  | 1.21E-08   | 3.08E-04  | 4.78E-09   | 1.41E-01  | 1.24E+01 | 9.66E-01 | 3.35E-06 | 13.2  |
| Metakaolin                                          | kg   | 4.05E-08   | 5.07E-04  | 5.61E-09   | 1.70E-01  | 5.01E+00 | 1.19E+00 | 7.27E-07 | 5.9   |
| Potassium silicate solution (Geosil 14515)          | kg   | 6.97E-08   | 1.94E-03  | 2.56E-08   | 2.34E-01  | 1.11E+01 | 8.81E+00 | 1.53E-05 | 11.9  |
| transport, freight, lorry 3.5-7.5 metric ton, EURO4 | t.km | 1.09E-07   | 2.45E-03  | 2.75E-08   | 4.50E-02  | 7.69E+00 | 5.22E+00 | 3.21E-06 | 8.2   |
| glass fibre                                         | kg   | 1.82E-07   | 9.17E-03  | 1.10E-07   | 6.29E-01  | 4.11E+01 | 8.10E+00 | 1.94E-05 | 43.7  |
| wollastonite                                        | kg   | 4.73E-08   | 3.58E-03  | 1.86E-08   | 2.08E-02  | 3.63E+00 | 1.81E+00 | 1.29E-06 | 3.8   |
| Steamed earth                                       | kg   | 2.36E-09   | 1.07E-04  | 2.02E-09   | 1.69E-02  | 1.36E+00 | 3.75E-01 | 9.00E-07 | 1.4   |
| Raw earth                                           | kg   | 8.89E-10   | 5.89E-05  | 1.19E-09   | 2.12E-03  | 9.12E-02 | 2.14E-01 | 4.34E-07 | 0.1   |

|                                                                      |    |          |          |          |          |          |          |          |       |
|----------------------------------------------------------------------|----|----------|----------|----------|----------|----------|----------|----------|-------|
| silica fume, densified                                               | kg | 6.50E-10 | 2.26E-05 | 3.01E-10 | 2.61E-04 | 4.74E-02 | 5.90E-02 | 1.08E-08 | 0.0   |
| calcium nitrate                                                      | kg | 1.43E-07 | 2.79E-03 | 5.73E-08 | 1.03E+00 | 1.84E+01 | 9.02E+00 | 5.34E-05 | 20.0  |
| plasticiser, for concrete, based on sulfonated melamine formaldehyde | kg | 2.23E-07 | 5.65E-03 | 7.02E-08 | 9.87E-01 | 3.38E+01 | 5.88E+00 | 1.74E-05 | 34.7  |
| transport, concrete 50MPa, m3                                        | m3 | 5.79E-06 | 1.67E-01 | 2.42E-06 | 2.30E+00 | 4.04E+02 | 4.40E+02 | 1.81E-04 | 432.7 |

### S3 LCA RESULTS: STRESSOR CONTRIBUTION TO ECOTOXICITY

Graphs below give stressor contribution detail for freshwater ecotoxicity for both characterisation methods used: ILCD 2018 ad ImpactWorld+. It shows that contributing stressors highly differs. While copper is present and significant in both case, Antimony, Chromium VI and Zinc dominate for ILCD and Aluminium clearly drives the impact for both short and long term in ImpactWorld+.

Stressor contribution to freshwater ecotoxicity, ILCD

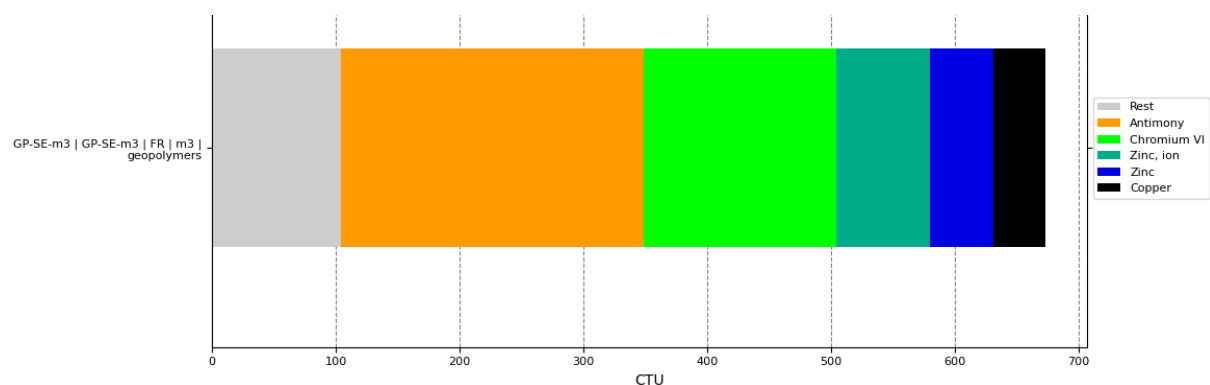

Stressor contribution to freshwater ecotoxicity, long term Impact World +

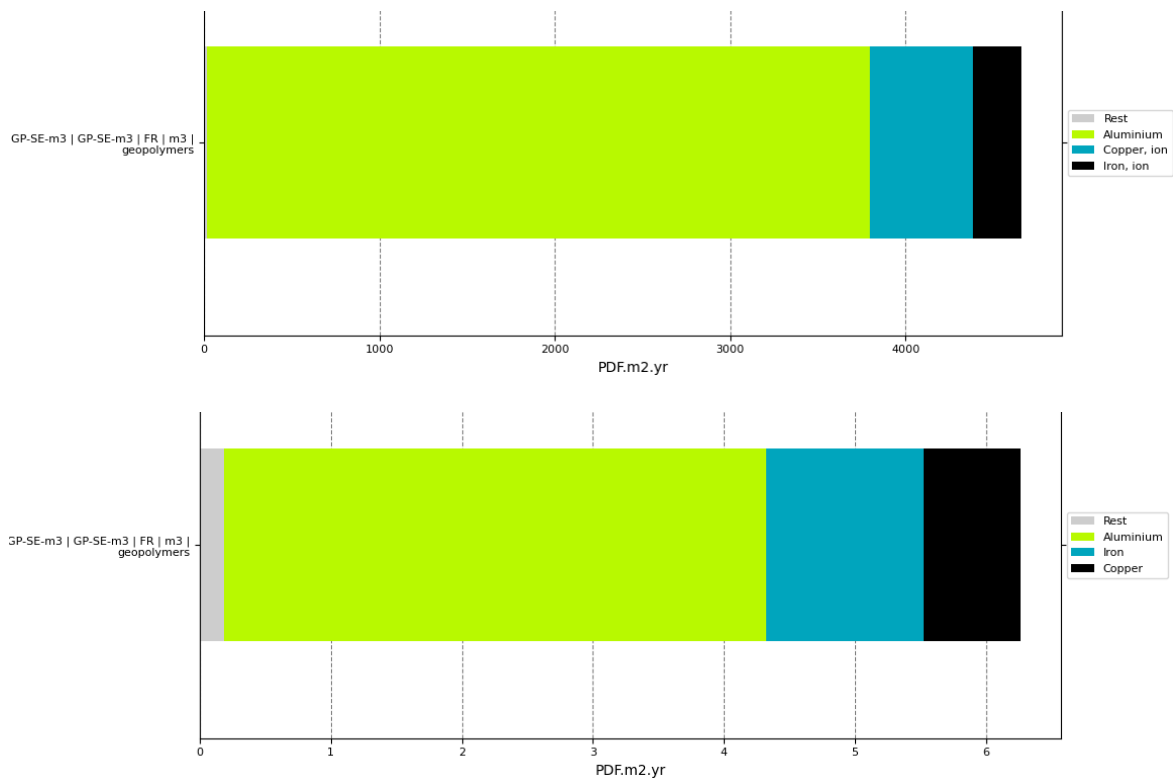

Supplement: s1 [file s1]
